# Supplementary material for: Facile synthesis of transparent superhydrophobic titania coating by using soot as a nanoimprint template
Source: Royal Society of Chemistry journal article supplement (doi:10.1039/c3ra43798a), 2013-01-01
Supplement: c3ra43798a.pdf [file c3ra43798a.pdf]

## **Supplementary Information**

### **Facile synthesis of transparent superhydrophobic titania coating by using soot as nanoimprint template**

Shanhu Liu, Munetoshi Sakai, Baoshun Liu, Chiaki Terashima, Kazuya Nakata and

Akira Fujishima

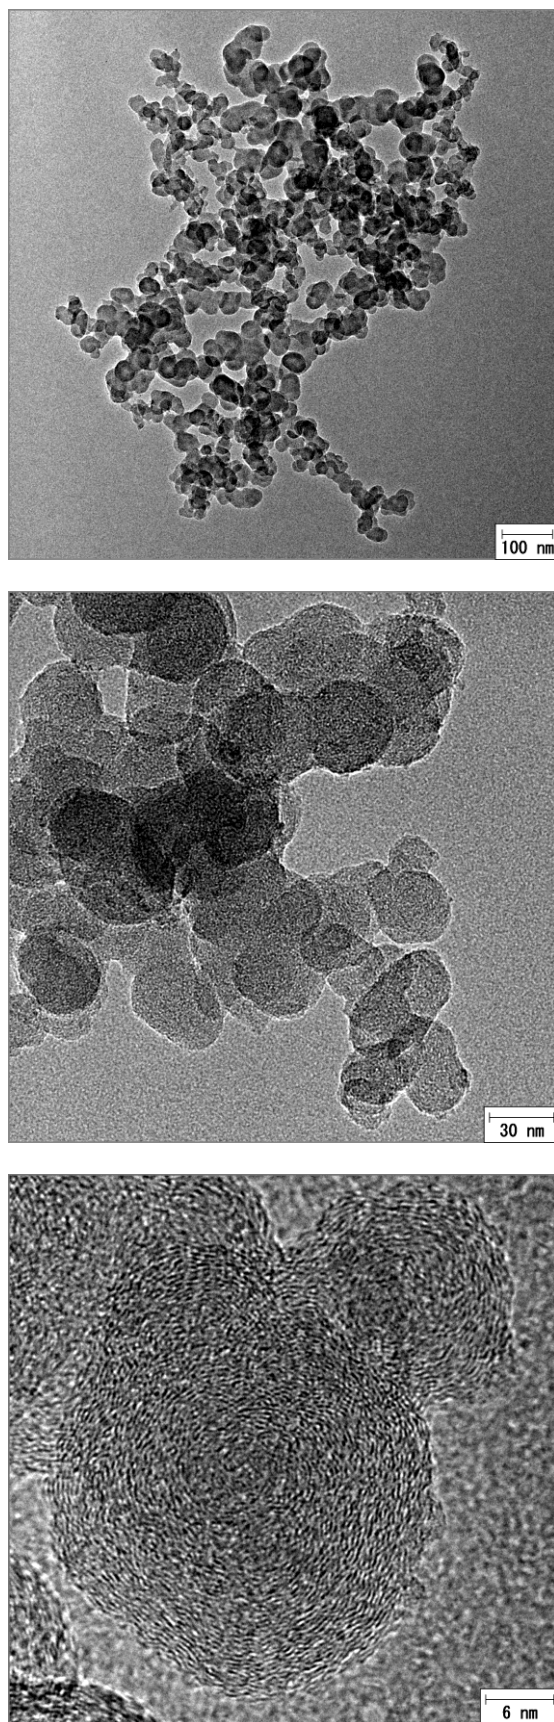

**Fig. S1** Low- and high-resolution TEM images of carbon nanoparticles

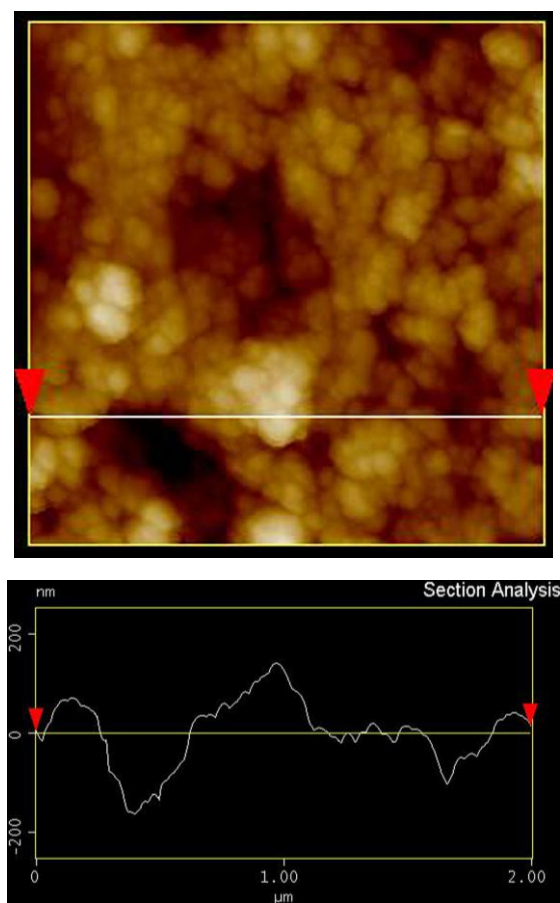

**Fig. S2** AFM image of superhydrophobic TiO<sub>2</sub> surface.

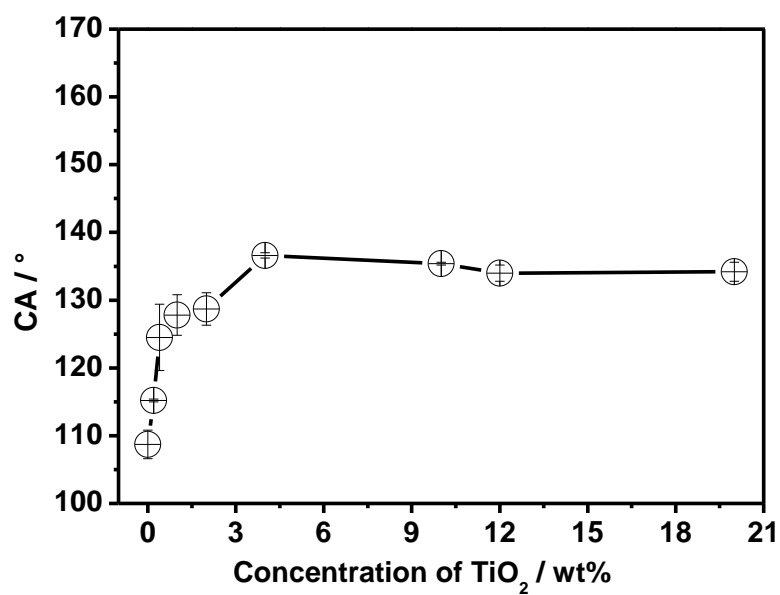

**Fig. S3** Contact angels of the  $\text{TiO}_2$  coating (without soot layer treatment) prepared using different concentrations of  $\text{TiO}_2$  suspensions.

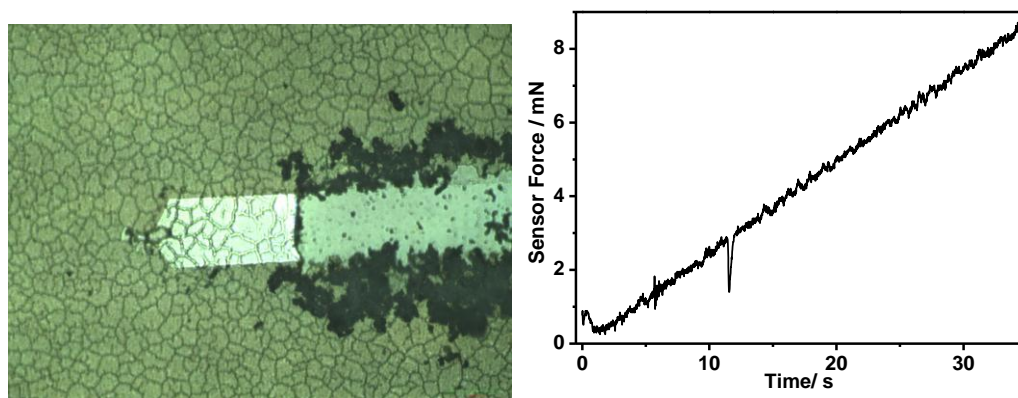

**Fig. S4** Nanolayer scratch test of the  $\text{TiO}_2$  coating. Right: Micrograph of the coating after scratch test; left: Loading Curve.

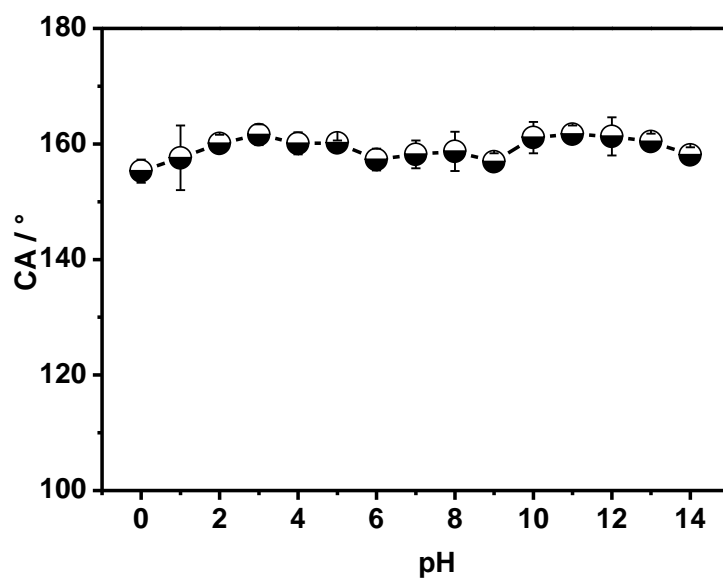

**Fig. S5** The relationship between pH values with contact angle of the prepared superhydrophobic film. The obtained surfaces show superhydrophobicity in pH values ranging from 0 (1.0 mol L<sup>-1</sup> HCl) to 14 (1.0 mol L<sup>-1</sup> NaOH)

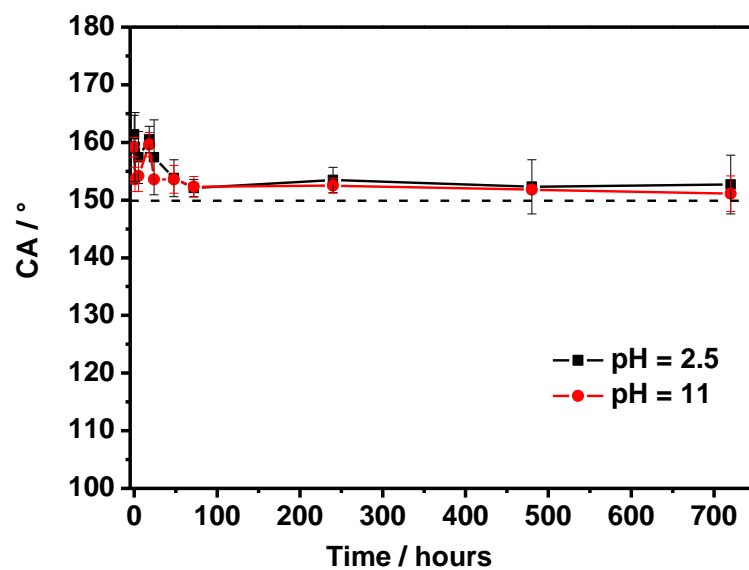

**Fig. S6** The superhydrophobicity of the prepared coating remains unchanged even after immersed in the acid (pH = 2.5) and basic (pH = 11.0) solution for one month.
